# Supplementary material for: Solvothermal synthesis of (Na0.8K0.2)0.5Bi0.5TiO3 piezoelectric catalyst with morphotropic-phase-boundary structure for efficient dye degradation
Source: Royal Society of Chemistry journal article supplement (doi:10.1039/d3nj02473c), 2023-01-01
Supplement: d3nj02473c1.pdf [file d3nj02473c1.pdf]

## Electronic Supplementary Information

### Solvothermal synthesis of $(\text{Na}_{0.8}\text{K}_{0.2})_{0.5}\text{Bi}_{0.5}\text{TiO}_3$ piezoelectric catalyst with morphotropic-phase-boundary structure for efficient dye degradation

Ning Xie<sup>a</sup>, Li Jiang<sup>a</sup>, Yuanwen Hou<sup>a</sup>, Hongquan Fu<sup>a</sup>, Juan Zhang<sup>a</sup>, Hejun Gao<sup>a,b</sup>, Yunwen Liao<sup>a,b\*</sup>

*a. Chemical Synthesis and Pollution Control Key Laboratory of Sichuan Province, College of Chemistry and Chemical Engineering, China West Normal University, Nanchong, Sichuan 637000, China*

*b. Institute of Applied Chemistry, China West Normal University, Nanchong, Sichuan 637000, China*

---

\* Corresponding author: Yunwen Liao (liao-yw@163.com)

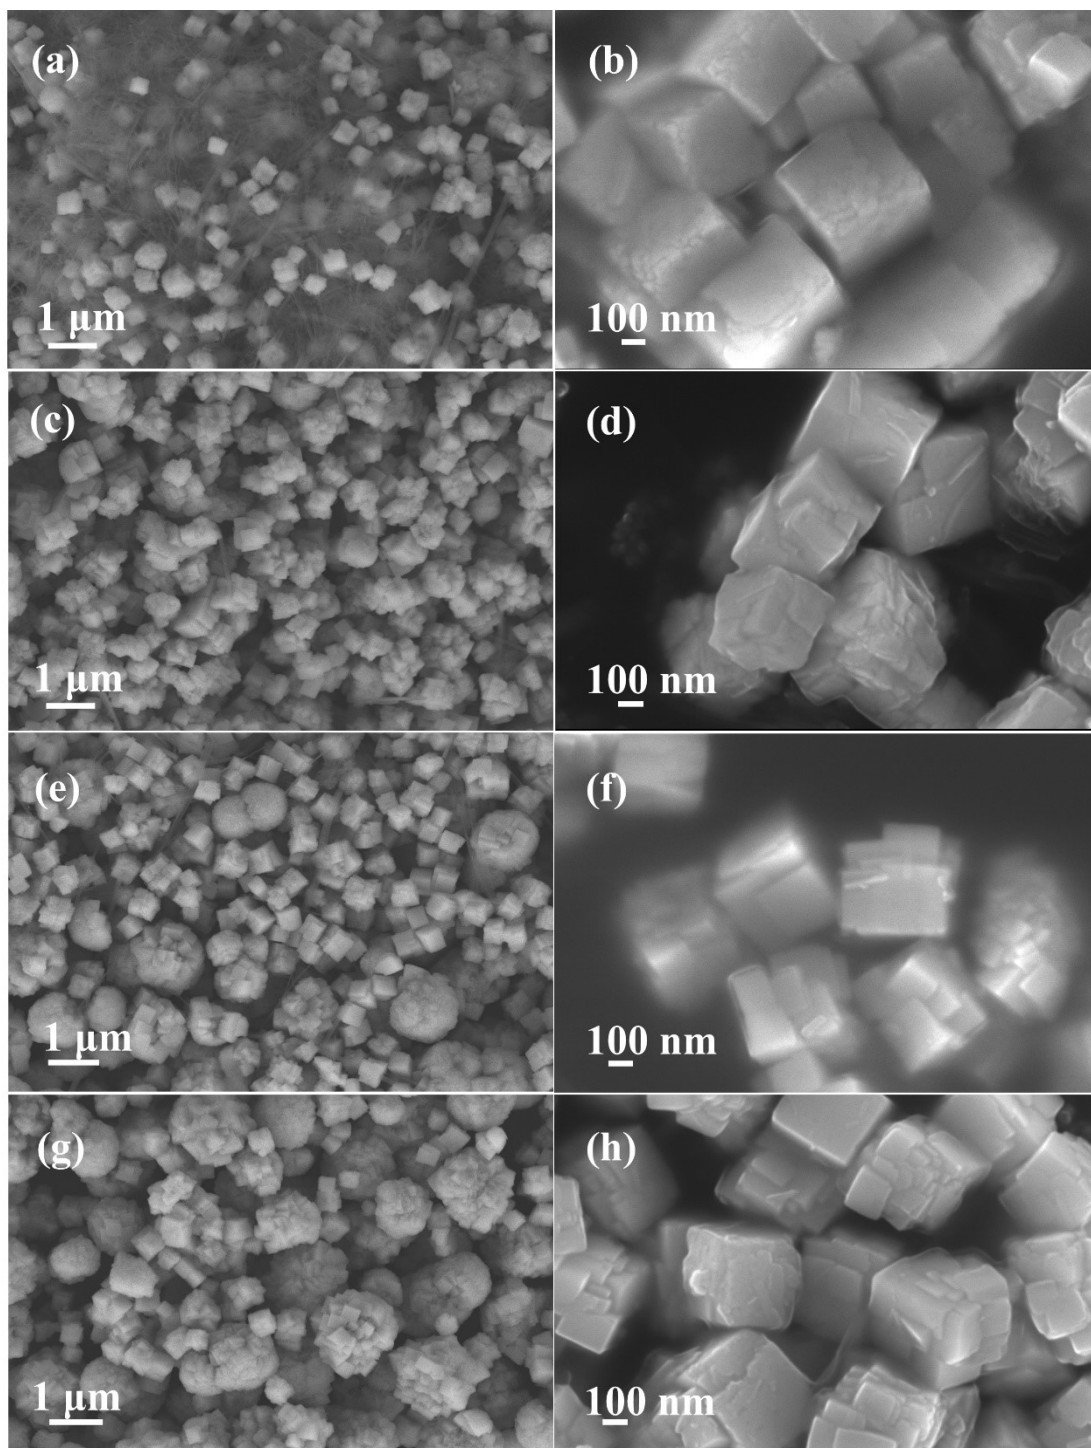

Fig. S1. The SEM images of (a-b)  $\text{Na}_{0.5}\text{Bi}_{0.5}\text{TiO}_3$ , (c-d)  $(\text{Na}_{0.9}\text{K}_{0.1})_{0.5}\text{Bi}_{0.5}\text{TiO}_3$ , (e-f)  $(\text{Na}_{0.8}\text{K}_{0.2})_{0.5}\text{Bi}_{0.5}\text{TiO}_3$  and (g-h)  $(\text{Na}_{0.7}\text{K}_{0.3})_{0.5}\text{Bi}_{0.5}\text{TiO}_3$  at different magnifications.

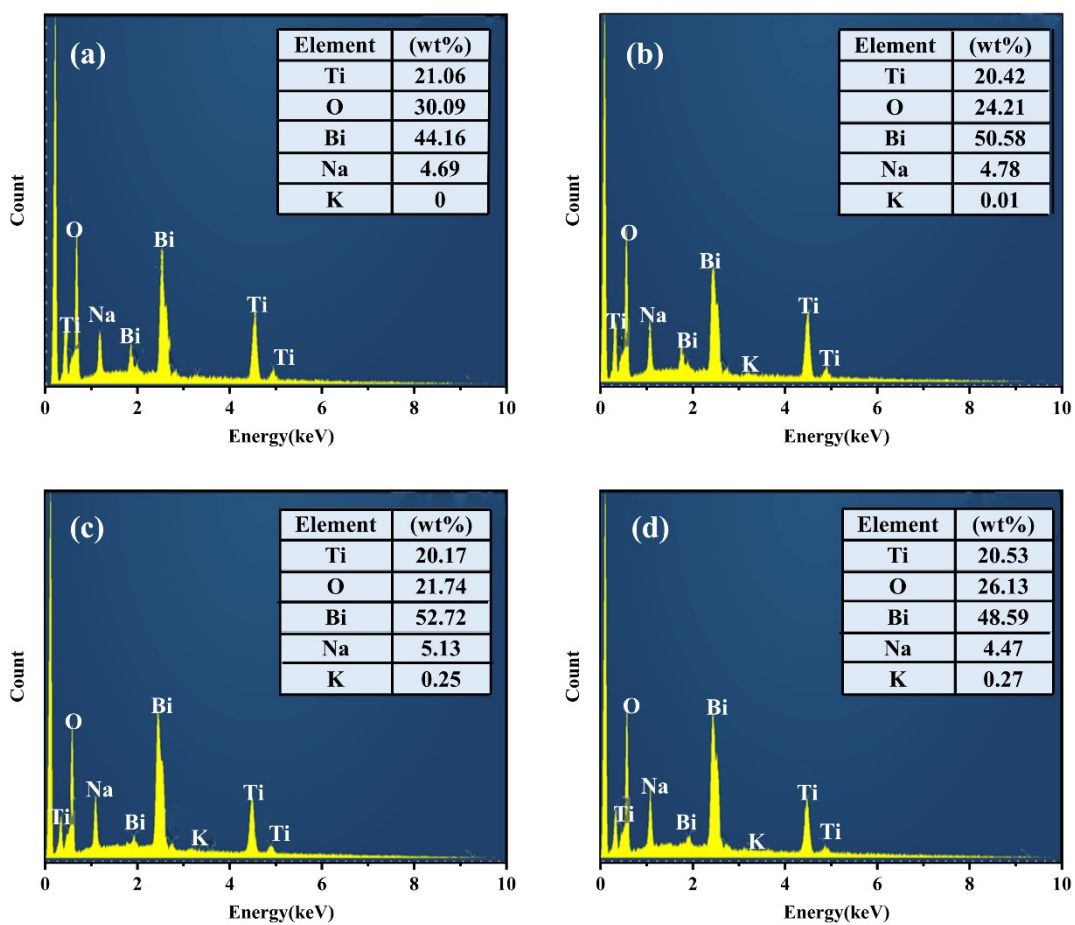

Fig. S2. EDS composition of (a)  $\text{Na}_{0.5}\text{Bi}_{0.5}\text{TiO}_3$ , (b)  $(\text{Na}_{0.9}\text{K}_{0.1})_{0.5}\text{Bi}_{0.5}\text{TiO}_3$ , (c)  $(\text{Na}_{0.8}\text{K}_{0.2})_{0.5}\text{Bi}_{0.5}\text{TiO}_3$  and (d)  $(\text{Na}_{0.7}\text{K}_{0.3})_{0.5}\text{Bi}_{0.5}\text{TiO}_3$ .

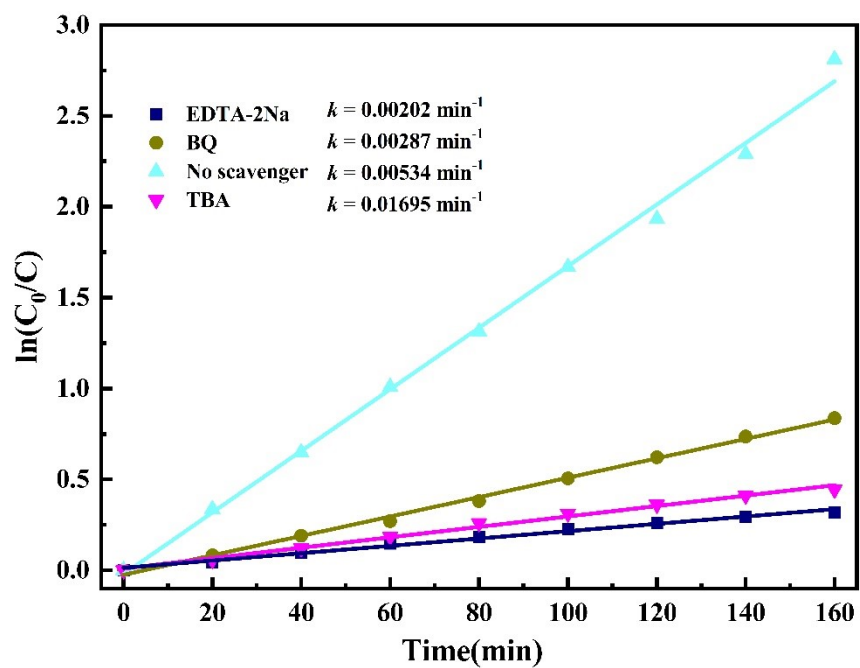

Fig. S3. First-order kinetic curves for free radical capture experiments.

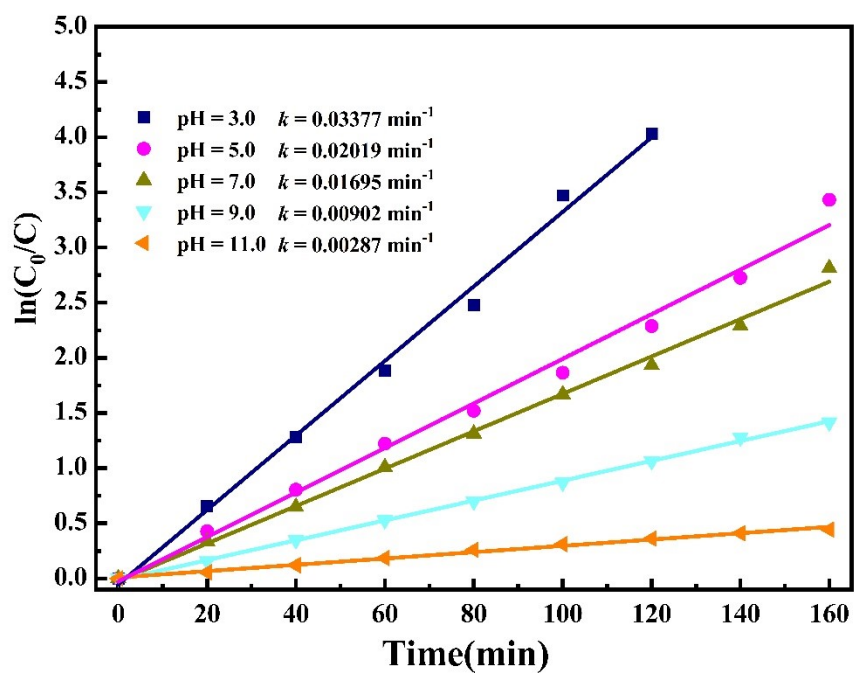

Fig. S4. First-order kinetic curves for MB degradation under different pH environments.
